# Supplementary material for: Synchrotron radiation based X-ray techniques for analysis of cathodes in Li rechargeable batteries
Source: Royal Society of Chemistry journal article supplement (doi:10.1039/d2ra01250b), 2022-01-01
Supplement: d2ra01250b2.pdf [file d2ra01250b2.pdf]

# **XANES Imaging**

# XANES Imaging

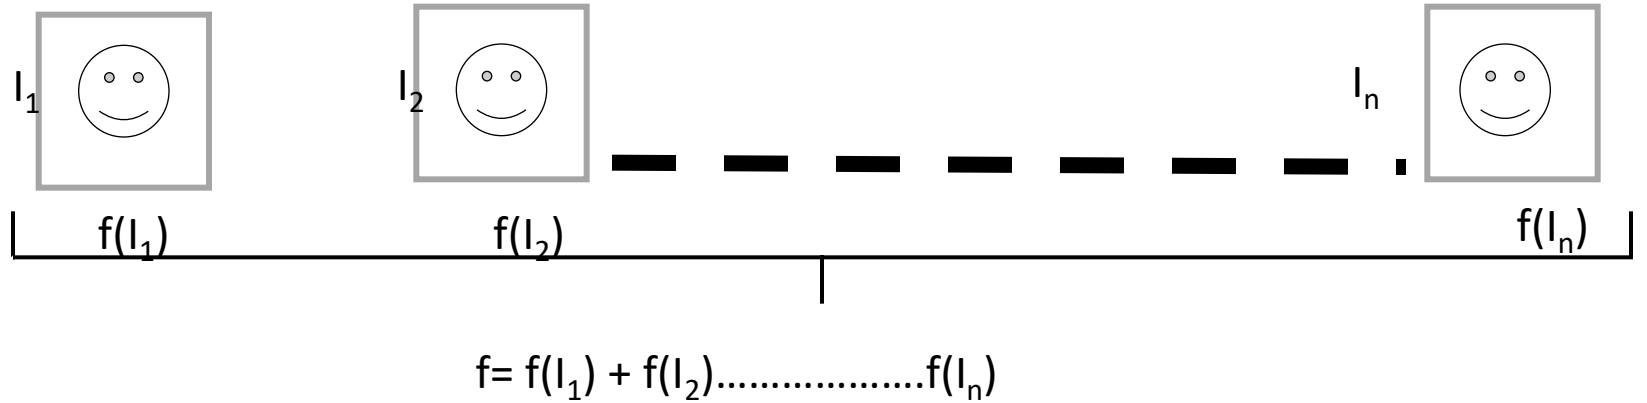

Extraction of XANES spectrum from TXM images

# XANES Imaging

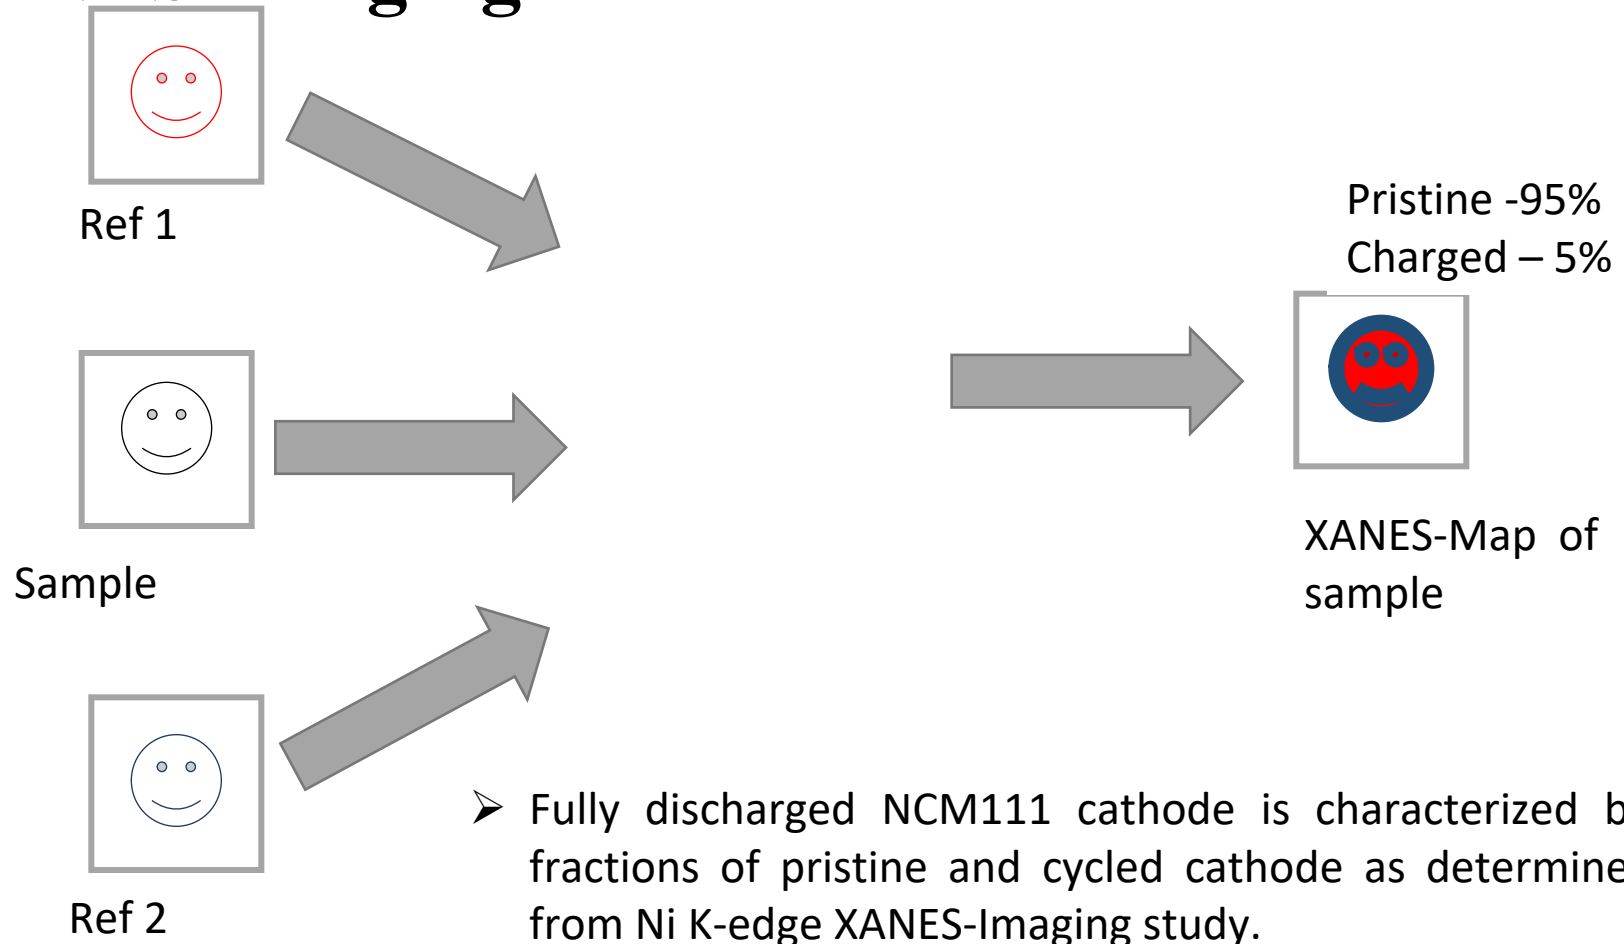

➤ Fully discharged NCM111 cathode is characterized by fractions of pristine and cycled cathode as determined from Ni K-edge XANES-Imaging study.
