# Supplementary material for: Synchrotron radiation based X-ray techniques for analysis of cathodes in Li rechargeable batteries
Source: Royal Society of Chemistry journal article supplement (doi:10.1039/d2ra01250b), 2022-01-01
Supplement: d2ra01250b3.pdf [file d2ra01250b3.pdf]

## Section S2

X-ray imaging (XNI) experiments on the secondary particle extracted from  $\text{LiNi}_{0.8}\text{Co}_{0.1}\text{Mn}_{0.1}\text{O}_2$  cathode using the milling method were performed at the 7C XNI beamline, PAL. X-ray energy was fixed to 8332.8 eV for tomography measurements, and the sample was rotated from 0 to  $180^\circ$  with a step size of  $1^\circ$ . These images were reconstructed using the OCTOPUS program, and volume rendering was done by AVIZO processing software.
